# Supplementary material for: Infections on the move: how transient phases of host movement influence disease spread
Source: PubMed Central journal article supplement (PMC5745403; doi:10.1098/rspb.2017.1807), 2017-12-20
Supplement: rspb20171807supp1.pdf [file rspb20171807supp1.pdf]

| model class                    | Reference              | Host system                                           | Parasite system                                         | movement phases | movement factors                      | movement data                     | infection spread processes | infection spread factors                    | infection data     |
|--------------------------------|------------------------|-------------------------------------------------------|---------------------------------------------------------|-----------------|---------------------------------------|-----------------------------------|----------------------------|---------------------------------------------|--------------------|
| proximity-based metapopulation | Ajelli et al. 2010*    | humans                                                | Influenza virus                                         | -               | -                                     | census data<br>airport records    | force of infection         | node size and proximity<br>(gravity)        | government records |
|                                | Balcon et al. 2009     | humans                                                | Influenza virus                                         | -               | -                                     | govn't records<br>airport records | -                          | node size and proximity<br>(gravity)        | government records |
|                                | Charu et al. 2017      | humans                                                | Influenza virus                                         | -               | -                                     | census data<br>govn't records     | -                          | node size and proximity<br>(gravity)        | physician records  |
|                                | Davis et al. 2008      | great gerbils<br>( <i>Rhombomys opimus</i> )          | plague<br>( <i>Yersinia pestis</i> )                    | -               | -                                     | field data<br>(mark-recapture)    | -                          | inter-node distance<br>(percolation)        | -                  |
|                                | Laperrière et al. 2016 | great gerbils<br>( <i>Rhombomys opimus</i> )          | fleas<br>( <i>Xenopsylla gerbilli</i> )                 | -               | -                                     | field data<br>(mark-recapture)    | -                          | inter-node distance                         | -                  |
|                                | Gurarie and Seto 2009  | humans                                                | blood flukes<br>( <i>Schistosoma japonicum</i> )        | -               | -                                     | -                                 | -                          | node size and proximity<br>(gravity)        | -                  |
|                                | Remais et al. 2010     | humans                                                | blood flukes<br>( <i>Schistosoma japonicum</i> )        | -               | -                                     | -                                 | -                          | proximity to streams<br>landscape structure | -                  |
|                                | Xia et al. 2004        | humans                                                | measles<br>( <i>Morbillivirus</i> )                     | -               | -                                     | -                                 | -                          | node size and proximity<br>(gravity)        | government records |
| kernel-based metapopulation    | Becker and Hall, 2016  | non-specific                                          | non-specific                                            | D-A             | -                                     | -                                 | -                          | habitat quality,<br>provisioning            | -                  |
|                                | Craft et al. 2011*     | Serengheti lions<br>( <i>Panthero leo</i> )           | canine distemper virus<br>( <i>Morbillivirus</i> )      | D-A             | host phenotype<br>(nomad vs resident) | field data<br>(GPS)               | -                          | infectious period                           | -                  |
|                                | Cross et al. 2005      | non-specific                                          | non-specific                                            | D-A             | none                                  | -                                 | -                          | -                                           | -                  |
|                                | Dalziel et al. 2013    | humans                                                | non-specific                                            | D-A             | host identity                         | census data                       | -                          | -                                           | -                  |
|                                | Fulford et al. 2002    | brushtail possums<br>( <i>Trichosurus vulpecula</i> ) | bovine tuberculosis<br>( <i>Mycobacterium bovis</i> )   | D-A             | age,<br>migrant mortality             | -                                 | -                          | -                                           | -                  |
|                                | Gog et al. 2002        | non-specific                                          | non-specific                                            | D-A             | none                                  | -                                 | -                          | -                                           | -                  |
|                                | Green et al. 2006      | livestock                                             | foot-and-mouth disease<br>( <i>Apthae epizooticae</i> ) | D-A             | individual identity                   | Govn't records                    | -                          | -                                           | Govn't records     |
|                                | Harding et al. 2012    | non-specific                                          | non-specific                                            | D-A             | -                                     | -                                 | -                          | allee effects                               | -                  |
| Hess et al. 1996               | non-specific           | non-specific                                          | D-A                                                     | node density    | -                                     | -                                 | -                          | -                                           |                    |

|                                  |                           |                                                           |                                                    |       |                                           |                                |                                                       |                   |                |
|----------------------------------|---------------------------|-----------------------------------------------------------|----------------------------------------------------|-------|-------------------------------------------|--------------------------------|-------------------------------------------------------|-------------------|----------------|
|                                  | Leach et al., 2016        | non-specific                                              | non-specific                                       | D-A   | node density                              | -                              | -                                                     | habitat quality   |                |
|                                  | McCallum and Dobson 2002  | non-specific                                              | non-specific                                       | D-A   | -                                         | -                              | -                                                     | -                 | -              |
|                                  | Park, 2012                | non-specific                                              | non-specific                                       | D-A   | -                                         | -                              | -                                                     | -                 | -              |
|                                  | Russel et al. 2006        | raccons<br>( <i>Procyon lotor</i> )                       | rabies<br>( <i>Lyssavirus</i> )                    | D-A   | node density                              | -                              | -                                                     | -                 | -              |
|                                  | Colizza et al., 2008      | humans                                                    | non-specific                                       | D-A   | traffic,<br>node density                  | census data<br>airline records | -                                                     | group size        | -              |
| Coupled metapopulation           | Jesse et al. 2008         | non-specific                                              | non-specific                                       | D-A   | -                                         | -                              | -                                                     | -                 | -              |
|                                  | Jesse and Hesterbeek 2011 | non-specific                                              | non-specific                                       | D-A   | preferred movement<br>distance            | -                              | -                                                     | -                 | -              |
| individual-based spatial network | Ajelli et al. 2010*       | humans                                                    | Influenza virus                                    | D-A   | host identity                             | census data                    | force of infection                                    | distance          | -              |
|                                  | Aleta et al. 2017         | humans                                                    | Influenza-like virus                               | D-A   | -                                         | -                              | -                                                     | -                 | -              |
|                                  | Bonnel et al. 2010        | red colobus monkeys<br>( <i>Procolobus rufomitratu</i> s) | microparasites<br>(non-specific)                   | D-T-A | Food resource<br>distribution             | -                              | force of infection<br>(direct transmission)           | node proximity    | -              |
|                                  | Craft et al. 2011*        | Serengheti lions<br>( <i>Panthero leo</i> )               | canine distemper virus<br>( <i>Morbillivirus</i> ) | D-T-A | host phenotype<br>(nomad vs resident)     | field data<br>(GPS)            | -                                                     | infectious period | -              |
|                                  | Keeling et al. 2010       | humans                                                    | multiple                                           | D-A   | host phenotype<br>(commuter/non-commuter) | census data                    | -                                                     | time of day       | Govn't records |
|                                  | Meloni et al. 2011        | humans                                                    | non-specific                                       | D-A   | infection risk in patches                 | -                              | -                                                     | -                 | -              |
|                                  | Riley and Ferguson 2006   | humans                                                    | smallpox                                           | D-A   | host identity                             | census data                    | force of infection                                    | -                 | -              |
|                                  | Springer et al. 2017      | <i>sifakas</i>                                            | <i>Chryptosporidium</i>                            | D-A   | host identity                             | field data<br>(GPS)            | force of infection<br>(environmental<br>transmission) | range overlap     | -              |
|                                  | Tracey et al. 2014        | bobcats                                                   | Feline<br>immunodeficiency virus                   | D-A   | host identity<br>landscape structure      | field data<br>(GPS)            | -                                                     | -                 | -              |
