# Supplementary material for: Infections on the move: how transient phases of host movement influence disease spread
Source: PubMed Central journal article supplement (PMC5745403; doi:10.1098/rspb.2017.1807), 2017-12-20
Supplement: rspb20171807supp2.pdf [file rspb20171807supp2.pdf]

| <b>Movement type</b> | <b>Method</b>                        | <b>movement phases</b> | <b>parasite</b>                                                | <b>host</b>                                                | <b>outcome</b>                 | <b>possible transient phase processes</b>         | <b>possible transient phase factors</b> | <b>reference</b>                        |
|----------------------|--------------------------------------|------------------------|----------------------------------------------------------------|------------------------------------------------------------|--------------------------------|---------------------------------------------------|-----------------------------------------|-----------------------------------------|
| dispersal            | genetics<br>(gene flow)              | D - A                  | freshwater trematodes                                          | long-finned eel<br><i>(A. dieffenbachii)</i>               | overlapping genetic structures | none cited                                        | none cited                              | Blasco-costa et al. 2012                |
|                      | genetics<br>(gene flow)              | D - A                  | marine trematode<br><i>(Gymnophallus choledochus)</i>          | irds (e.g. ducks, gulls, wader)                            | overlapping genetic structures | none cited                                        | none cited                              | Feis et al. 2015                        |
|                      | genetics<br>(assignment tests)       | D - A                  | black-tailed prairie dog<br><i>Cynomys ludovicianus</i>        | fleas<br><i>Oropsylla hirsuta</i>                          | unrelated genetic structures   | none cited                                        | none cited                              | Jones and Britten 2010                  |
|                      | genetics<br>(viral gene flow)        | D - A                  | vampire bats<br><i>Desmodus rotundus</i>                       | rabies virus<br><i>Lyssavirus, Rabodviridae</i>            | overlapping genetic structures | none cited                                        | landscape structure                     | Streiker et al. 2016                    |
| local                | mark-recapture                       | D - A                  | Swallow bugs<br><i>(Oeciacus vicarius)</i>                     | cliff swallows<br><i>(Petrochelidon pyrrhonota)</i>        | increased prevalence           | none cited                                        | none cited                              | Brown and Brown 2004                    |
|                      | GPS tracking                         | D - T - A              | canine distemper virus<br><i>(Morbillivirus)</i>               | serengheti lions<br><i>(Panthera leo)</i>                  | no effect by nomads            | recovery                                          | host grouping, movement behaviour       | Craft et al. 2011                       |
|                      | mark-recapture                       | D - A                  | nematodes<br><i>(Pharyngodon wandillahensis)</i>               | pygmy blue-tongued lizard<br><i>(Tiliqua adelaidensis)</i> | increased transmission         | infection forcing<br>(environmental transmission) | habitat                                 | Fenner et al. 2011                      |
| migration            | Citizen Science surveys              | D - T - A              | protozoa<br><i>(Ophryocystis elektroscirrha)</i>               | monarch butterfly<br><i>(Danaeus plexxipus)</i>            | decreased prevalence           | infection forcing<br>host mortality               | host grouping, habitat                  | Altizer et al. 2000, Bartel et al. 2011 |
|                      | remote tracking<br>(radio telemetry) | D - T                  | chytrid fungus<br><i>(Batrachochytrium dendrobatidis)</i>      | common toad<br><i>(Bufo bufo)</i>                          | decreased prevalence           | recovery                                          | habitat                                 | Daversa et al. unpublished              |
|                      | mark-recapture                       | D - A                  | avian influenza virus                                          | mallard ducks<br><i>(Anas platyrhynchos)</i>               | increased prevalence           | none cited                                        | none cited                              | van Dijk et al. 2014                    |
|                      | Citizen Science surveys              | D - T - A              | bacteria<br><i>(Mycoplasma gallisepticum)</i>                  | house finches<br><i>(Carpodacus mexicanus)</i>             | increased prevalence           | none cited                                        | none cited                              | Hosseini et al. 2011                    |
|                      | mark-recapture                       | D - T - A              | avian influenza virus                                          | pink-footed geese<br><i>(Anser brachyrhynchus)</i>         | decreased prevalence           | recovery                                          | host grouping<br>(allopatry), habitat   | Hoye et al. 2011                        |
|                      | Field surveys                        | T                      | sea lice<br><i>(Lepeophtheirus salmonis, Caligus clemensi)</i> | pink salmon<br><i>(Oncorhynchus gorbuscha)</i>             | decreased prevalence           | no infections present                             | host grouping<br>(allopatry)            | Krkosek et al. 2007                     |
|                      | remote tracking<br>(GPS)             | D - A                  | ticks<br><i>(Ixodes ricinus)</i>                               | red deer<br><i>(Cervus elaphus)</i>                        | decreased prevalence           | recovery                                          | habitat<br>(elevation)                  | Mysterud et al. 2016                    |
| mark-recapture       | D - A                                | trematodes             | galaaxid fish<br><i>(Galaxia spp.)</i>                         | decreased prevalence                                       | recovery                       | habitat<br>(water salinity)                       | Poulin. et al. 2012                     |                                         |
